# Supplementary material for: Plant Extract Valorization ofMelissa officinalisL. for Agroindustrial Purposes through Their Biochemical Properties and Biological Activities
Source: Hindawi journal article supplement (doi:10.1155/2020/9728093), 2020-06-05
Supplement: f1 [file 9728093.f1.pdf]

## Supplements

### Supplement 1: Morphological characters

| N° | characters           | code |
|----|----------------------|------|
| 1  | Plant height (cm)    | (PH) |
| 2  | N° of Branches/plant | (nB) |
| 3  | Stem Diameter (cm)   | (SD) |
| 4  | Leaf length (cm)     | (LL) |
| 5  | Leaf width (cm)      | (LW) |
| 6  | N°of leaves          | (nL) |
| 7  | N° of flower         | (nF) |
| 8  | N°of nodes           | (nN) |
| 9  | Fresh weight (g)     | (FW) |
| 10 | Dry weight (g)       | (DW) |
| 11 | seed yield/plant (g) | (SY) |

## Supplement 2: Raw data of morphological studies:

Morphological results: 4 populations

System SAS 11:06 Thursday, March 8, 2018 47

### The ANOVA Procedure

Information on class levels

| Class  | Levels | Values                                                               |
|--------|--------|----------------------------------------------------------------------|
| Origin | 4      | Al FR Nfz Tbk                                                        |
| Num    | 26     | 1 2 3 4 5 6 7 8 9 10 11 12 13 14 15 16 17 18 19 20 21 22 23 24 25 26 |

Number of observations 88

System SAS 11:06 Thursday, March 8, 2018 48

### The ANOVA Procedure

Dependent Variable: **HP**

| Source          | Sum of DDL | square      | Value     | Medium square | F | Pr > F        |
|-----------------|------------|-------------|-----------|---------------|---|---------------|
| Model           | 28         | 7374.10072  | 263.36074 | 2.45          |   | <b>0.0019</b> |
| Error           | 59         | 6336.57826  | 107.39963 |               |   |               |
| Corrected Total | 87         | 13710.67898 |           |               |   |               |

| R square | Coeff Var | Racine MSE | LP Mean  |
|----------|-----------|------------|----------|
| 0.537836 | 27.52308  | 10.36338   | 37.65341 |

| Source | DDL | Anova SS    | Value      | Medium square | F | Pr > F |
|--------|-----|-------------|------------|---------------|---|--------|
| Origin | 3   | 1534.109243 | 511.369748 | 4.76          |   | 0.0049 |
| Num    | 25  | 5839.991477 | 233.599659 | 2.18          |   | 0.0075 |

**The ANOVA Procedure**

Dependent Variable: **nB**

| Source          | DDL | Sum of square | Value<br>Medium square | F    | Pr > F |
|-----------------|-----|---------------|------------------------|------|--------|
| Model           | 28  | 1439.639327   | 51.415690              | 4.03 | <.0001 |
| Error           | 59  | 751.951582    | 12.744942              |      |        |
| Corrected Total | 87  | 2191.590909   |                        |      |        |

R carré    Coeff Var    Racine MSE    NbR Mean  
 0.656892    72.38722    3.570006    4.931818

| Source | DDL | Anova SS    | Value<br>Medium square | F     | Pr > F |
|--------|-----|-------------|------------------------|-------|--------|
| Origin | 3   | 885.2150849 | 295.0716950            | 23.15 | <.0001 |
| Num    | 25  | 554.4242424 | 22.1769697             | 1.74  | 0.0418 |

**The ANOVA Procedure**

Dependent Variable: **SD**

| Source          | DDL | Sum of square | Value<br>Medium square | F    | Pr > F |
|-----------------|-----|---------------|------------------------|------|--------|
| Model           | 28  | 12.58050283   | 0.44930367             | 2.72 | 0.0006 |
| Error           | 59  | 9.73767899    | 0.16504541             |      |        |
| Corrected Total | 87  | 22.31818182   |                        |      |        |

R carré    Coeff Var    Racine MSE    DBP Mean  
 0.563689    14.53280    0.406258    2.795455

| Source | DDL | Anova SS   | Value<br>Medium square | F    | Pr > F |
|--------|-----|------------|------------------------|------|--------|
| Origin | 3   | 3.17898768 | 1.05966256             | 6.42 | 0.0008 |

Num 25 9.40151515 0.37606061 2.28 0.0050

System SAS 11:06 Thursday, March 8, 2018 51

**The ANOVA Procedure**

Dependent Variable: **nN**

| Source          | DDL | square      | Sum of Medium square | Value | F | Pr > F        |
|-----------------|-----|-------------|----------------------|-------|---|---------------|
| Model           | 28  | 170.4547453 | 6.0876695            | 1.49  |   | <b>0.0978</b> |
| Error           | 59  | 240.4088911 | 4.0747270            |       |   |               |
| Corrected Total | 87  | 410.8636364 |                      |       |   |               |

R carré Coeff Var Racine MSE NbN Mean  
 0.414869 16.98245 2.018595 11.88636

| Source | DDL | Anova SS    | Sum of Medium square | Value | F | Pr > F |
|--------|-----|-------------|----------------------|-------|---|--------|
| Origin | 3   | 4.7577756   | 1.5859252            | 0.39  |   | 0.7612 |
| Num    | 25  | 165.6969697 | 6.6278788            | 1.63  |   | 0.0643 |

**The ANOVA Procedure**

Dependent Variable: **LL**

| Source          | DDL | square      | Sum of Medium square | Value | F | Pr > F |
|-----------------|-----|-------------|----------------------|-------|---|--------|
| Model           | 28  | 55.8130989  | 1.9933250            | 1.96  |   | 0.0149 |
| Error           | 59  | 59.8719011  | 1.0147780            |       |   |        |
| Corrected Total | 87  | 115.6850000 |                      |       |   |        |

R carré Coeff Var Racine MSE LongF Mean  
 0.482458 17.44350 1.007362 5.775000

|        | Valeur |                |                                  |      |        |
|--------|--------|----------------|----------------------------------|------|--------|
| Source | DDL    | Anova SS       | Medium square                    | F    | Pr > F |
| Origin | 3      | 24.27476557    | 8.09158852                       | 7.97 | 0.0002 |
| Num    | 25     | 31.53833333    | 1.26153333                       | 1.24 | 0.2434 |
|        |        | Le Système SAS | 11:06 Thursday, March 8, 2018 53 |      |        |

The ANOVA Procedure

Dependent Variable: LW

|                 | Somme des |             | Value         |      |        |
|-----------------|-----------|-------------|---------------|------|--------|
| Source          | DDL       | carrés      | Medium square | F    | Pr > F |
| Model           | 28        | 35.87880753 | 1.28138598    | 1.85 | 0.0243 |
| Error           | 59        | 40.95107884 | 0.69408608    |      |        |
| Corrected Total | 87        | 76.82988636 |               |      |        |

R carré    Coeff Var    Racine MSE    larF Mean  
0.466990    17.62789    0.833118    4.726136

|        | Value |             |               |      |        |
|--------|-------|-------------|---------------|------|--------|
| Source | DDL   | Anova SS    | Medium square | F    | Pr > F |
| Origin | 3     | 9.73892116  | 3.24630705    | 4.68 | 0.0054 |
| Num    | 25    | 26.13988636 | 1.04559545    | 1.51 | 0.0999 |

System SAS    11:06 Thursday, March 8, 2018 54

The ANOVA Procedure

Dependent Variable: nL

|        | Sum of |             | Value         |      |        |
|--------|--------|-------------|---------------|------|--------|
| Source | DDL    | square      | Medium square | F    | Pr > F |
| Model  | 28     | 117291.9030 | 4188.9965     | 2.52 | 0.0014 |
| Error  | 59     | 97943.8698  | 1660.0656     |      |        |

Corrected Total 87 215235.7727

R carré Coeff Var Racine MSE NbF Mean  
0.544946 64.83659 40.74390 62.84091

Value

| Source | DDL | Anova SS    | Medium square | F    | Pr > F |
|--------|-----|-------------|---------------|------|--------|
| Origin | 3   | 18981.04690 | 6327.01563    | 3.81 | 0.0145 |
| Num    | 25  | 98310.85606 | 3932.43424    | 2.37 | 0.0035 |

System SAS 11:06 Thursday, March 8, 2018 55

### The ANOVA Procedure

Dependent Variable: nF

| Source          | DDL | Sum of square | Medium square | F    | Pr > F |
|-----------------|-----|---------------|---------------|------|--------|
| Model           | 28  | 70509.5122    | 2518.1969     | 2.30 | 0.0037 |
| Error           | 59  | 64690.3060    | 1096.4459     |      |        |
| Corrected Total | 87  | 135199.8182   |               |      |        |

R carré Coeff Var Racine MSE Nbfr Mean  
0.521521 63.73383 33.11262 51.95455

Value

| Source | DDL | Anova SS    | Medium square | F     | Pr > F |
|--------|-----|-------------|---------------|-------|--------|
| Origin | 3   | 37967.86067 | 12655.95356   | 11.54 | <.0001 |
| Num    | 25  | 32541.65152 | 1301.66606    | 1.19  | 0.2890 |

### The ANOVA Procedure

Dependent Variable: FW

| Source | DDL | Sum of square | Medium square | F | Pr > F |
|--------|-----|---------------|---------------|---|--------|
|--------|-----|---------------|---------------|---|--------|

|                 |    |             |           |      |        |
|-----------------|----|-------------|-----------|------|--------|
| Model           | 28 | 1954.187063 | 69.792395 | 2.20 | 0.0056 |
| Error           | 59 | 1874.787482 | 31.776059 |      |        |
| Corrected Total | 87 | 3828.974545 |           |      |        |

R carré    Coeff Var    Racine MSE    PF Mean  
0.510368    75.38879    5.637026    7.477273

| Source | DDL | Anova SS    | Medium square | F    | Pr > F |
|--------|-----|-------------|---------------|------|--------|
| Origin | 3   | 212.694185  | 70.898062     | 2.23 | 0.0940 |
| Num    | 25  | 1741.492879 | 69.659715     | 2.19 | 0.0070 |

### The ANOVA Procedure

Dependent Variable: **DW**

| Source          | DDL | Sum of square | Medium square | F    | Pr > F |
|-----------------|-----|---------------|---------------|------|--------|
| Model           | 28  | 172.0740000   | 6.1455000     | 2.08 | 0.0092 |
| Error           | 59  | 174.3984988   | 2.9559068     |      |        |
| Corrected Total | 87  | 346.4724989   |               |      |        |

R carré    Coeff Var    Racine MSE    PS Mean  
0.496645    75.41056    1.719275    2.279886

| Source | DDL | Anova SS    | Medium square | F    | Pr > F |
|--------|-----|-------------|---------------|------|--------|
| Origin | 3   | 22.7044262  | 7.5681421     | 2.56 | 0.0635 |
| Num    | 25  | 149.3695739 | 5.9747830     | 2.02 | 0.0139 |

System SAS    11:06 Thursday, March 8, 2018 58

### The ANOVA Procedure

Dependent Variable: **SY**

| Source | DDL | Sum of square | Medium square | F | Pr > F |
|--------|-----|---------------|---------------|---|--------|
|--------|-----|---------------|---------------|---|--------|

|                 |    |             |            |      |        |
|-----------------|----|-------------|------------|------|--------|
| Model           | 28 | 5.56994603  | 0.19892664 | 0.76 | 0.7878 |
| Error           | 59 | 15.50302284 | 0.26276310 |      |        |
| Corrected Total | 87 | 21.07296886 |            |      |        |

|          |           |            |            |
|----------|-----------|------------|------------|
| R carré  | Coeff Var | Racine MSE | Rdtgr Mean |
| 0.264317 | 140.0123  | 0.512604   | 0.366114   |

Value

|        |     |            |               |      |        |
|--------|-----|------------|---------------|------|--------|
| Source | DDL | Anova SS   | Medium square | F    | Pr > F |
| Origin | 3   | 1.54781341 | 0.51593780    | 1.96 | 0.1293 |
| Num    | 25  | 4.02213261 | 0.16088530    | 0.61 | 0.9110 |

System SAS 11:06 Thursday, March 8, 2018 59

### The ANOVA Procedure

Duncan's Multiple Range Test for HP

Note: This test controls the Type I comparison wise error rate, not the experiment wise error rate.

|                             |          |
|-----------------------------|----------|
| Alpha                       | 0.05     |
| Error Degrees of Freedom    | 59       |
| Middle Square Error         | 107.3996 |
| Harmonic mean of cell sizes | 21.77468 |

Note: Uneven cell sizes

|                |       |       |       |
|----------------|-------|-------|-------|
| Mean numbers   | 2     | 3     | 4     |
| Critical range | 6.285 | 6.611 | 6.827 |

Means with the same letter are not very different.

|                   |         |    |        |
|-------------------|---------|----|--------|
| Duncan Groupement | Moyenne | Nb | origin |
| A                 | 43.346  | 26 | FR     |
| A                 |         |    |        |
| B A               | 38.524  | 21 | Nfz    |
| B                 |         |    |        |
| B                 | 33.762  | 21 | G      |
| B                 |         |    |        |
| B                 | 33.425  | 20 | Tbk    |



**The ANOVA Procedure**

Duncan's Multiple Range Test for nB

Note: This test controls the Type I comparisonwise error rate, not the experimentwise error rate.

Alpha 0.05  
 Error Degrees of Freedom 59  
 Middle Square Error 12.74494  
 Harmonic mean of cell sizes 21.77468

Note: Uneven cell sizes

|                |       |       |       |
|----------------|-------|-------|-------|
| Mean numbers   | 2     | 3     | 4     |
| Critical range | 2.165 | 2.277 | 2.352 |

Means with the same letter are not very different.

| Duncan | Groupement | Moyenne | Nb  | origin |
|--------|------------|---------|-----|--------|
| A      | 10.571     | 21      | G   |        |
| B      | 3.538      | 26      | FR  |        |
| B      |            |         |     |        |
| B      | 3.143      | 21      | Nfz |        |
| B      |            |         |     |        |
| B      | 2.700      | 20      | Tbk |        |

**The ANOVA Procedure**

Duncan's Multiple Range Test for SD

Note: This test controls the Type I comparisonwise error rate, not the experimentwise error rate.

Alpha 0.05  
Error Degrees of Freedom 59  
Middle Square Error 0.165045  
Harmonic mean of cell sizes 21.77468

Note: Uneven cell sizes

|                |       |       |       |
|----------------|-------|-------|-------|
| Mean numbers   | 2     | 3     | 4     |
| Critical range | .2464 | .2592 | .2676 |

Means with the same letter are not very different.

| Duncan Groupement | Moyenne | Nb | origin |
|-------------------|---------|----|--------|
|-------------------|---------|----|--------|

|     |        |    |     |
|-----|--------|----|-----|
| A   | 3.0476 | 21 | Nfz |
| A   |        |    |     |
| B A | 2.8571 | 21 | G   |
| B   |        |    |     |
| B   | 2.7692 | 26 | FR  |
|     |        |    |     |
| C   | 2.5000 | 20 | Tbk |

**The ANOVA Procedure**

Duncan's Multiple Range Test for nN

Note: This test controls the Type I comparisonwise error rate, not the experimentwise error rate.

|                             |          |
|-----------------------------|----------|
| Alpha                       | 0.05     |
| Error Degrees of Freedom    | 59       |
| Middle Square Error         | 4.074727 |
| Harmonic mean of cell sizes | 21.77468 |

Note: Uneven cell sizes

|                |       |       |       |
|----------------|-------|-------|-------|
| Mean numbers   | 2     | 3     | 4     |
| Critical range | 1.224 | 1.288 | 1.330 |

Means with the same letter are not very different.

| Duncan Groupement | Moyenne | Nb | origin |
|-------------------|---------|----|--------|
|-------------------|---------|----|--------|

|   |         |    |     |
|---|---------|----|-----|
| A | 12.1905 | 21 | G   |
| A |         |    |     |
| A | 12.0476 | 21 | Nfz |
| A |         |    |     |
| A | 11.7308 | 26 | FR  |
| A |         |    |     |
| A | 11.6000 | 20 | Tbk |

**The ANOVA Procedure**

Duncan's Multiple Range Test for LL

Note: This test controls the Type I comparisonwise error rate, not the experimentwise error rate.

Alpha 0.05  
 Error Degrees of Freedom 59  
 Middle Square Error 1.014778  
 Harmonic mean of cell sizes 21.77468

Note: Uneven cell sizes

|                |       |       |       |
|----------------|-------|-------|-------|
| Mean numbers   | 2     | 3     | 4     |
| Critical range | .6109 | .6426 | .6636 |

Means with the same letter are not very different.

| Duncan Groupement | Moyenne | Nb | origin |
|-------------------|---------|----|--------|
| A                 | 6.5462  | 26 | FR     |
| B                 | 5.6619  | 21 | G      |
| B                 |         |    |        |
| B                 | 5.4905  | 21 | Nfz    |
| B                 |         |    |        |
| B                 | 5.1900  | 20 | Tbk    |

**The ANOVA Procedure**

Duncan's Multiple Range Test for LW

Note: This test controls the Type I comparisonwise error rate, not the experimentwise error rate.

Alpha 0.05  
 Error Degrees of Freedom 59  
 Middle Square Error 0.694086  
 Harmonic mean of cell sizes 21.77468

Note: Uneven cell sizes

|                |       |       |       |
|----------------|-------|-------|-------|
| Mean numbers   | 2     | 3     | 4     |
| Critical range | .5052 | .5315 | .5488 |

Means with the same letter are not very different.

| Duncan Groupement | Moyenne | Nb | origin |
|-------------------|---------|----|--------|
|-------------------|---------|----|--------|

|     |        |    |     |
|-----|--------|----|-----|
| A   | 5.1846 | 26 | FR  |
| A   |        |    |     |
| B A | 4.7762 | 21 | Nfz |
| B   |        |    |     |
| B   | 4.4619 | 21 | G   |
| B   |        |    |     |
| B   | 4.3550 | 20 | Tbk |

**The ANOVA Procedure**

Duncan's Multiple Range Test for nL

Note: This test controls the Type I comparisonwise error rate, not the experimentwise error rate.

|                             |          |
|-----------------------------|----------|
| Alpha                       | 0.05     |
| Error Degrees of Freedom    | 59       |
| Middle Square Error         | 1660.066 |
| Harmonic mean of cell sizes | 21.77468 |

Note: Uneven cell sizes.

|                |       |       |       |
|----------------|-------|-------|-------|
| Mean numbers   | 2     | 3     | 4     |
| Critical range | 24.71 | 25.99 | 26.84 |

Means with the same letter are not very different.

Duncan Groupement Moyenne Nb origin

|     |       |    |     |
|-----|-------|----|-----|
| A   | 79.57 | 21 | G   |
| A   |       |    |     |
| A   | 70.86 | 21 | Nfz |
| A   |       |    |     |
| B A | 61.46 | 26 | FR  |
| B   |       |    |     |
| B   | 38.65 | 20 | Tbk |

**The ANOVA Procedure**

Duncan's Multiple Range Test for nF

Note: This test controls the Type I comparisonwise error rate, not the experimentwise error rate.

|                             |          |
|-----------------------------|----------|
| Alpha                       | 0.05     |
| Error Degrees of Freedom    | 59       |
| Middle Square Error         | 1096.446 |
| Harmonic mean of cell sizes | 21.77468 |

Note: Uneven cell sizes

|                |       |       |       |
|----------------|-------|-------|-------|
| Mean numbers   | 2     | 3     | 4     |
| Critical range | 20.08 | 21.12 | 21.81 |

Means with the same letter are not very different.

| Duncan Groupement | Moyenne | Nb | origin |
|-------------------|---------|----|--------|
|-------------------|---------|----|--------|

|   |       |    |     |
|---|-------|----|-----|
| A | 71.76 | 21 | G   |
| A |       |    |     |
| A | 70.31 | 26 | FR  |
| B | 36.40 | 20 | Tbk |
| B |       |    |     |
| B | 24.24 | 21 | Nfz |

**The ANOVA Procedure**

Duncan's Multiple Range Test for FW

Note: This test controls the Type I comparisonwise error rate, not the experimentwise error rate.

|                             |          |
|-----------------------------|----------|
| Alpha                       | 0.05     |
| Error Degrees of Freedom    | 59       |
| Middle Square Error         | 31.77606 |
| Harmonic mean of cell sizes | 21.77468 |

Note: Uneven cell sizes.

|                |       |       |       |
|----------------|-------|-------|-------|
| Mean numbers   | 2     | 3     | 4     |
| Critical range | 3.419 | 3.596 | 3.713 |

Means with the same letter are not very different.

Duncan Groupement Mean Nb origin

|     |       |    |     |
|-----|-------|----|-----|
| A   | 8.981 | 21 | G   |
| A   |       |    |     |
| B A | 8.381 | 26 | FR  |
| B A |       |    |     |
| B A | 7.410 | 21 | Nfz |
| B   |       |    |     |
| B   | 4.795 | 20 | Tbk |



**The ANOVA Procedure**

Duncan's Multiple Range Test for DW

Note: This test controls the Type I comparisonwise error rate, not the experimentwise error rate.

Alpha 0.05  
Error Degrees of Freedom 59  
Middle Square Error 2.955907  
Harmonic mean of cell sizes 21.77468

Note: Uneven cell sizes.

|                |       |       |       |
|----------------|-------|-------|-------|
| Mean number    | 2     | 3     | 4     |
| Critical range | 1.043 | 1.097 | 1.133 |

Means with the same letter are not very different.

| Duncan Groupement | Mean | Nb | origin |
|-------------------|------|----|--------|
|-------------------|------|----|--------|

|   |        |        |        |
|---|--------|--------|--------|
| A | 2.9390 | 21     | G      |
| A |        |        |        |
| B | A      | 2.4342 | 26 FR  |
| B | A      |        |        |
| B | A      | 2.1914 | 21 Nfz |
| B |        |        |        |
| B | 1.4800 | 20     | Tbk    |

**The ANOVA Procedure**

Duncan's Multiple Range Test for SY

Note: This test controls the Type I comparisonwise error rate, not the experimentwise error rate.

|                             |          |
|-----------------------------|----------|
| Alpha                       | 0.05     |
| Error Degrees of Freedom    | 59       |
| Middle Square Error         | 0.262763 |
| Harmonic mean of cell sizes | 21.77468 |

Note: Uneven cell sizes.

|                 |       |       |       |
|-----------------|-------|-------|-------|
| Number of means | 2     | 3     | 4     |
| Critical range  | .3109 | .3270 | .3377 |

Means with the same letter are not very different.

Duncan Groupement Mean Nb origin

|     |        |    |     |
|-----|--------|----|-----|
| A   | 0.5537 | 21 | G   |
| A   |        |    |     |
| B A | 0.3744 | 26 | FR  |
| B A |        |    |     |
| B A | 0.3642 | 20 | Tbk |
| B   |        |    |     |
| B   | 0.1701 | 21 | Nfz |

**CORRELATION**

11 Variables : PH nB SD nN LL LW nL nF FW DW SY

Simple statistics

| Variable | Nb | Mean     | Standard deviation | Sum       | Minimum  | Maximum   |
|----------|----|----------|--------------------|-----------|----------|-----------|
| PH       | 88 | 37.65341 | 12.55365           | 3314      | 11.00000 | 66.00000  |
| nB       | 88 | 4.93182  | 5.01903            | 434.00000 | 1.00000  | 27.00000  |
| SD       | 88 | 2.79545  | 0.50649            | 246.00000 | 2.00000  | 4.00000   |
| nN       | 88 | 11.88636 | 2.17315            | 1046      | 6.00000  | 17.00000  |
| LL       | 88 | 5.77500  | 1.15313            | 508.20000 | 3.50000  | 8.50000   |
| LW       | 88 | 4.72614  | 0.93974            | 415.90000 | 3.10000  | 7.80000   |
| nL       | 88 | 62.84091 | 49.73906           | 5530      | 12.00000 | 289.00000 |
| nF       | 88 | 51.95455 | 39.42107           | 4572      | 5.00000  | 144.00000 |
| FW       | 88 | 7.47727  | 6.63409            | 658.00000 | 1.00000  | 37.40000  |
| DW       | 88 | 2.27989  | 1.99561            | 200.63000 | 0.30000  | 11.70000  |
| SY       | 88 | 0.36611  | 0.49216            | 32.21800  | 0        | 2.95000   |

Coefficients of correlation of Pearson, N = 88

Prob > |r| under H0: Rho=0

|    | PH      | nB      | SD      | nN      | LL      | LW       |
|----|---------|---------|---------|---------|---------|----------|
| PH | 1.00000 | 0.20814 | 0.48676 | 0.62590 | 0.29310 | 0.15555  |
|    |         | 0.0517  | <.0001  | <.0001  | 0.0056  | 0.1479   |
| nB | 0.20814 | 1.00000 | 0.16627 | 0.32281 | 0.03267 | -0.08564 |
|    | 0.0517  |         | 0.1216  | 0.0022  | 0.7625  | 0.4276   |

|    |         |          |         |         |         |         |
|----|---------|----------|---------|---------|---------|---------|
| SD | 0.48676 | 0.16627  | 1.00000 | 0.45901 | 0.28241 | 0.27217 |
|    | <.0001  | 0.1216   |         | <.0001  | 0.0077  | 0.0103  |
| nN | 0.62590 | 0.32281  | 0.45901 | 1.00000 | 0.34516 | 0.23674 |
|    | <.0001  | 0.0022   | <.0001  |         | 0.0010  | 0.0264  |
| LL | 0.29310 | 0.03267  | 0.28241 | 0.34516 | 1.00000 | 0.86657 |
|    | 0.0056  | 0.7625   | 0.0077  | 0.0010  |         | <.0001  |
| LW | 0.15555 | -0.08564 | 0.27217 | 0.23674 | 0.86657 | 1.00000 |
|    | 0.1479  | 0.4276   | 0.0103  | 0.0264  | <.0001  |         |

Coefficients of correlation of Pearson, N = 88

Prob > |r| under H0: Rho=0

|    | nL      | nF      | FW      | DW      | SY      |
|----|---------|---------|---------|---------|---------|
| PH | 0.52113 | 0.47038 | 0.51412 | 0.50845 | 0.27303 |
|    | <.0001  | <.0001  | <.0001  | <.0001  | 0.0101  |
| nB | 0.69401 | 0.44591 | 0.63983 | 0.68258 | 0.58647 |
|    | <.0001  | <.0001  | <.0001  | <.0001  | <.0001  |
| SD | 0.35093 | 0.18317 | 0.33316 | 0.34671 | 0.10195 |
|    | 0.0008  | 0.0876  | 0.0015  | 0.0009  | 0.3446  |
| nN | 0.51047 | 0.43774 | 0.52873 | 0.54445 | 0.28609 |
|    | <.0001  | <.0001  | <.0001  | <.0001  | 0.0069  |
| LL | 0.19338 | 0.31918 | 0.34016 | 0.32936 | 0.13762 |
|    | 0.0710  | 0.0024  | 0.0012  | 0.0017  | 0.2010  |

|    |         |         |         |         |         |
|----|---------|---------|---------|---------|---------|
| LW | 0.11700 | 0.21080 | 0.31760 | 0.29913 | 0.09550 |
|    | 0.2777  | 0.0487  | 0.0026  | 0.0046  | 0.3761  |

System SAS 11:06 Thursday, March 8, 2018 71

### CORRELATION

Coefficients of correlation of Pearson, N = 88

Prob > |r| under H0: Rho=0

|    | PH      | nB      | SD      | nN      | LL      | LW      |
|----|---------|---------|---------|---------|---------|---------|
| nL | 0.52113 | 0.69401 | 0.35093 | 0.51047 | 0.19338 | 0.11700 |
|    | <.0001  | <.0001  | 0.0008  | <.0001  | 0.0710  | 0.2777  |
| nF | 0.47038 | 0.44591 | 0.18317 | 0.43774 | 0.31918 | 0.21080 |
|    | <.0001  | <.0001  | 0.0876  | <.0001  | 0.0024  | 0.0487  |
| FW | 0.51412 | 0.63983 | 0.33316 | 0.52873 | 0.34016 | 0.31760 |
|    | <.0001  | <.0001  | 0.0015  | <.0001  | 0.0012  | 0.0026  |
| DW | 0.50845 | 0.68258 | 0.34671 | 0.54445 | 0.32936 | 0.29913 |
|    | <.0001  | <.0001  | 0.0009  | <.0001  | 0.0017  | 0.0046  |
| SY | 0.27303 | 0.58647 | 0.10195 | 0.28609 | 0.13762 | 0.09550 |
|    | 0.0101  | <.0001  | 0.3446  | 0.0069  | 0.2010  | 0.3761  |

Coefficients of correlation of Pearson, N = 88

Prob > |r| under H0: Rho=0

|    |    |    |    |    |
|----|----|----|----|----|
| nL | nF | FW | DW | SY |
|----|----|----|----|----|

|    |         |         |         |         |         |
|----|---------|---------|---------|---------|---------|
| nL | 1.00000 | 0.45474 | 0.87297 | 0.86252 | 0.54454 |
|    |         | <.0001  | <.0001  | <.0001  | <.0001  |
| nF | 0.45474 | 1.00000 | 0.47847 | 0.50428 | 0.62369 |
|    | <.0001  |         | <.0001  | <.0001  | <.0001  |
| FW | 0.87297 | 0.47847 | 1.00000 | 0.98901 | 0.57544 |
|    | <.0001  | <.0001  |         | <.0001  | <.0001  |
| DW | 0.86252 | 0.50428 | 0.98901 | 1.00000 | 0.61140 |
|    | <.0001  | <.0001  | <.0001  |         | <.0001  |
| SY | 0.54454 | 0.62369 | 0.57544 | 0.61140 | 1.00000 |
|    | <.0001  | <.0001  | <.0001  | <.0001  |         |

**Supplement 3:** Dendrogram established from Euclidean squared for standard variables using average method based agro-morphological traits among four populations of *M. officinalis*

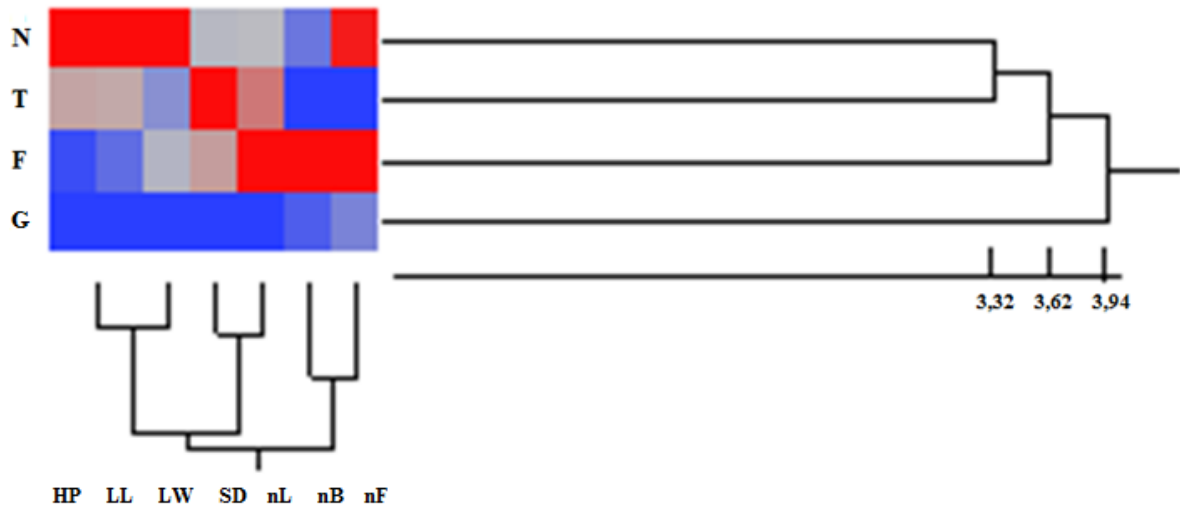

HP = height plant; SD = stem diameter; nF = number of flowers; LL = leaf length; LW= leaf width; nL = number of leaves; nB = number of branches
